# Supplementary material for: A facile synthesis for hierarchical porous CeO2 nanobundles and their superior catalytic performance for CO oxidation
Source: Royal Society of Chemistry journal article supplement (doi:10.1039/c4ta03875d), 2014-09-10
Supplement: c4ta03875d1.pdf [file c4ta03875d1.pdf]

## Electronic Supplementary Information (ESI)

### A facile synthesis for hierarchical porous CeO<sub>2</sub> nanobundles and their superior catalytic performance for CO oxidation

Richuan Rao,<sup>\*a</sup> Ming Yang,<sup>b</sup> Changshun Li,<sup>b</sup> Huaze Dong,<sup>a</sup> Song Fang<sup>a</sup> and Aimin Zhang<sup>\*b</sup>

<sup>a</sup> Department of Chemistry and Chemical Engineering, Hefei Normal University, Hefei, Anhui, 230601, PR China. E-mail: raorc123@163.com.

<sup>b</sup> Key Laboratory of Mesoscopic Chemistry, School of Chemistry and Chemical Engineering, Nanjing University, Nanjing, Jiangsu, 210093, PR China. E-mail: zhangam@nju.edu.cn.

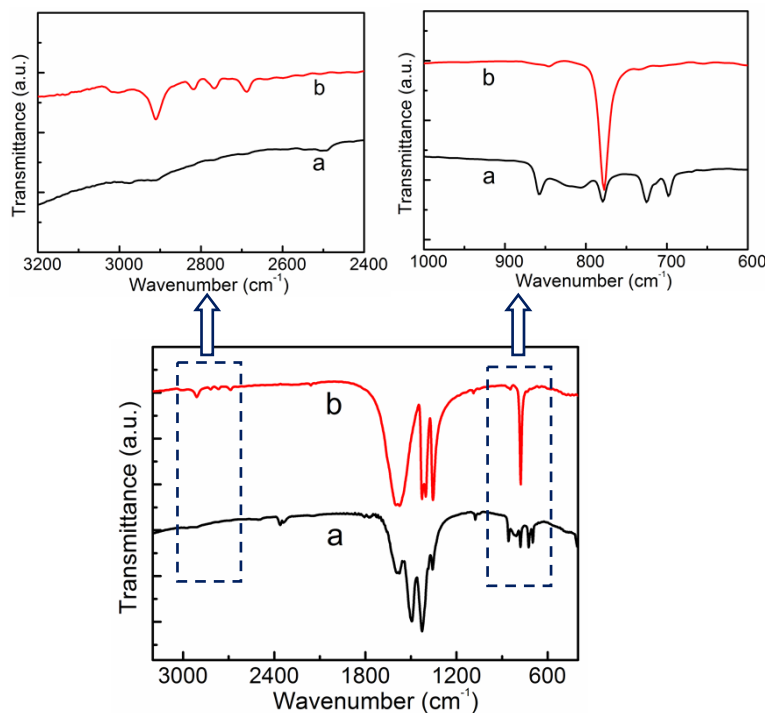

Fig.S1 FT-IR spectra of CeO<sub>2</sub> precursors. (a) Nanobundles, (b) Cerium formate.

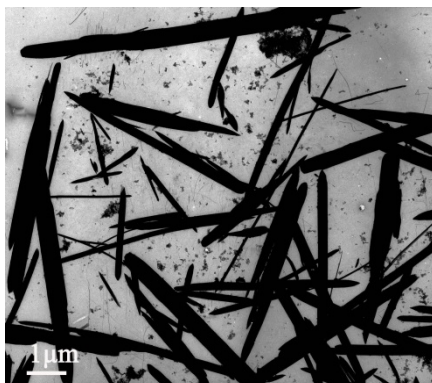

**Fig.S2** TEM image of CeO<sub>2</sub> precursor samples in a formaldehyde-assisted hydrothermal system without carbonate.

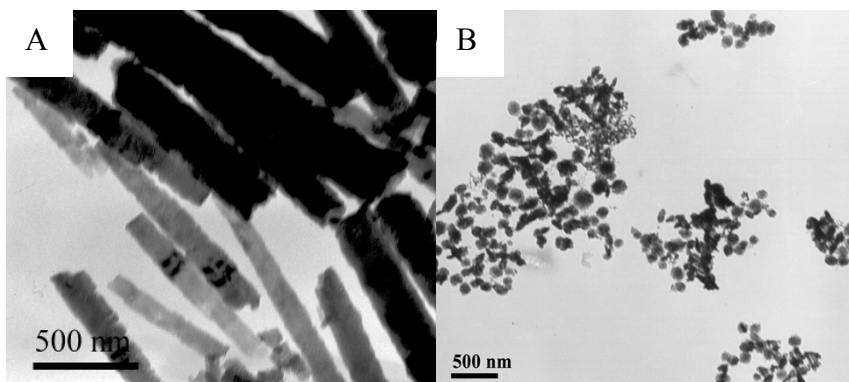

**Fig.S3** TEM images of CeO<sub>2</sub> precursor samples prepared by controlling different cation type in a formaldehyde-assisted hydrothermal system with carbonate. (A) Sodium ions, (B) Potassium ions.

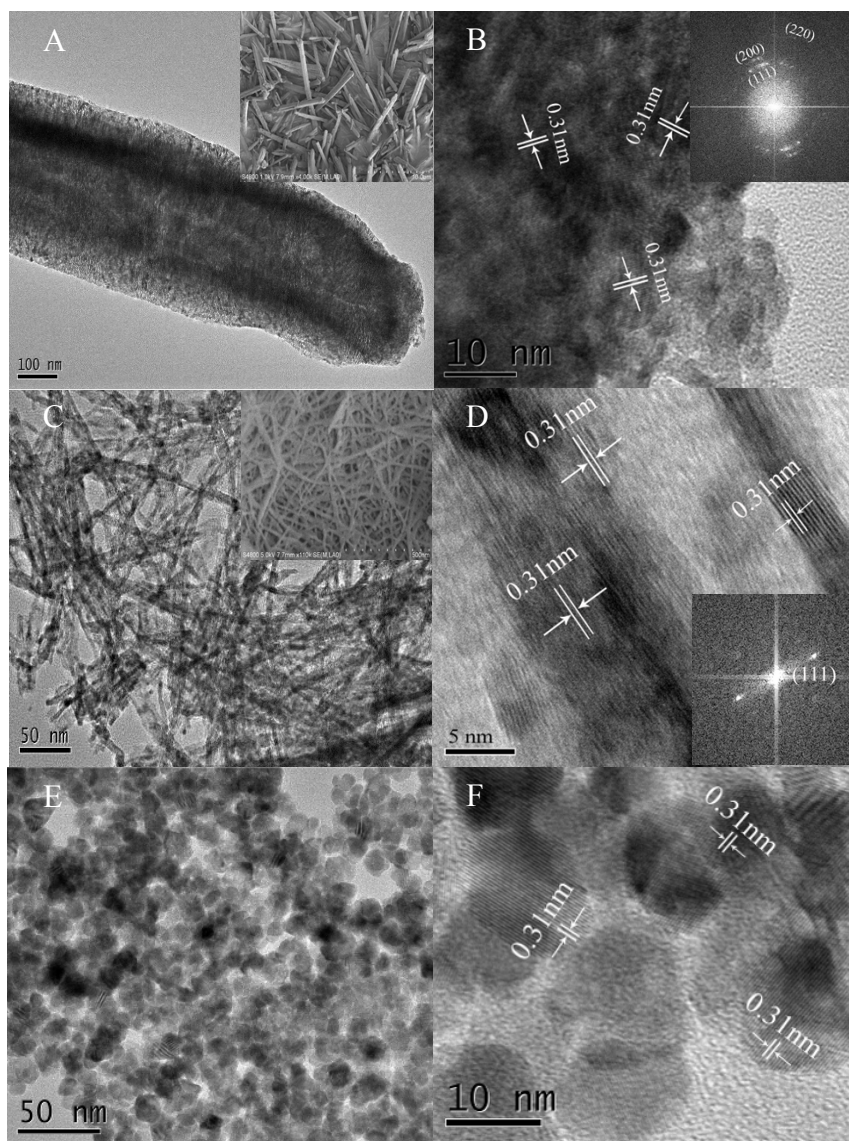

**Fig.S4** TEM images and high-resolution TEM images of CeO<sub>2</sub> nanostructure materials. (A,B) Nanorods, (C,D) Nanowires, (E,F) Nanoparticles.

**Table S1** Summary of d-spacing, interatomic distance a, BET surface area, pore volume of CeO<sub>2</sub> materials and CO conversion rate and T<sub>50</sub> for CO oxidation

| Morphology    | d (nm) | a (nm) | D (nm) <sup>a</sup> | BET (m <sup>2</sup> g <sup>-1</sup> ) | Pore volume (cm <sup>3</sup> g <sup>-1</sup> ) <sup>b</sup> | CO conversion rate at 240°C (μmol m <sup>-2</sup> s <sup>-1</sup> ) | T <sub>50</sub> (°C) <sup>c</sup> |
|---------------|--------|--------|---------------------|---------------------------------------|-------------------------------------------------------------|---------------------------------------------------------------------|-----------------------------------|
| Nanobundles   | 3.125  | 5.413  | 9.2                 | 130.4                                 | 0.096412                                                    | 0.162                                                               | 213                               |
| Nanorods      | 3.123  | 5.410  | 9.9                 | 98.3                                  | 0.135062                                                    | 0.125                                                               | 223                               |
| Nanoparticles | 3.124  | 5.411  | 10.9                | 77.4                                  | 0.127599                                                    | 0.064                                                               | 261                               |
| Nanowires     | 3.113  | 5.392  | 8.1                 | 76.9                                  | 0.102127                                                    | 0.023                                                               | 272                               |

<sup>a</sup>The mean grain size is calculated using Scherrer's equation. <sup>b</sup>The pore volume, measured at P/P<sub>0</sub> = 0.975. <sup>c</sup>the light-off temperature T<sub>50</sub>, corresponding to 50% conversion of CO.

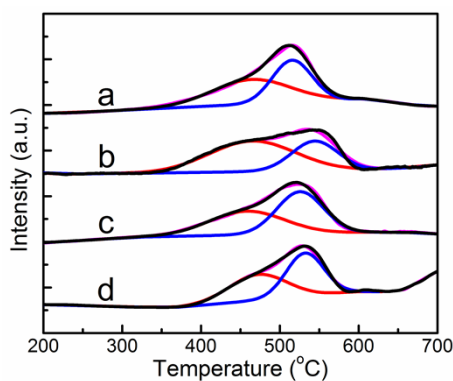

**Fig.S5** H<sub>2</sub>-TPR profiles of CeO<sub>2</sub> materials. (a) Nanobundles, (b) Nanorods, (c) Nanoparticles, (d) Nanowires.
